# Supplementary material for: A Newly Developed Method-Based Xanthine Oxidoreductase Activities in Various Human Liver Diseases
Source: MDPI journal article supplement (doi:10.3390/biomedicines11051445), 2023-05-14
Supplement: s1 [file s1]

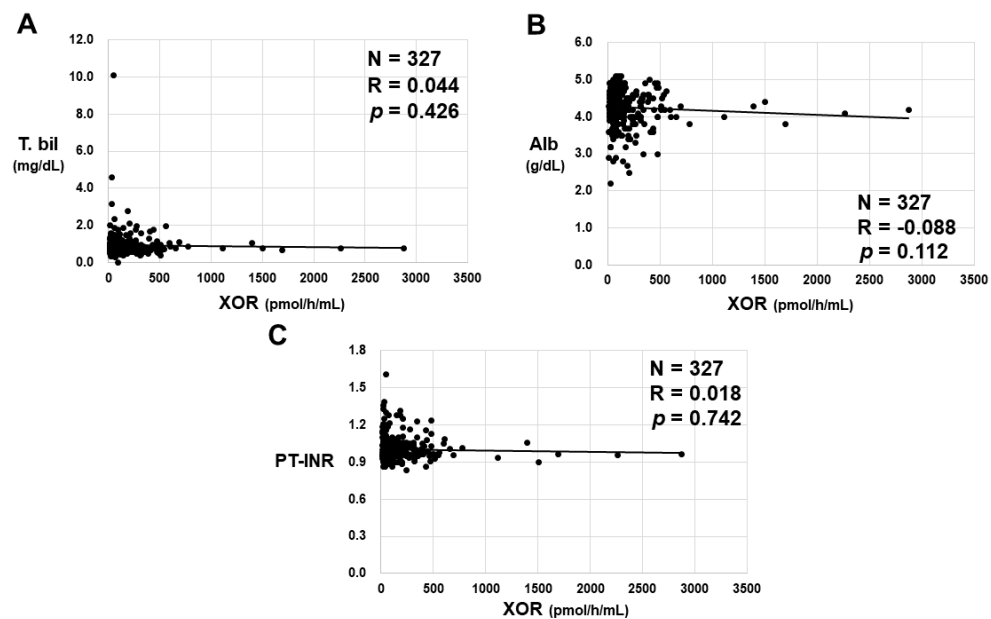

**Supplemental Figure S1.** The relationship between plasma XOR activities and the levels of parameters of liver tests: (A) total bilirubin (T. bil), (B) albumin (Alb) and (C) prothrombin time-international normalized ratio (PT-INR). The correlation between two values was analyzed using Spearman's rank-correlation coefficient. N; the number of subjects, R; correlation coefficient.

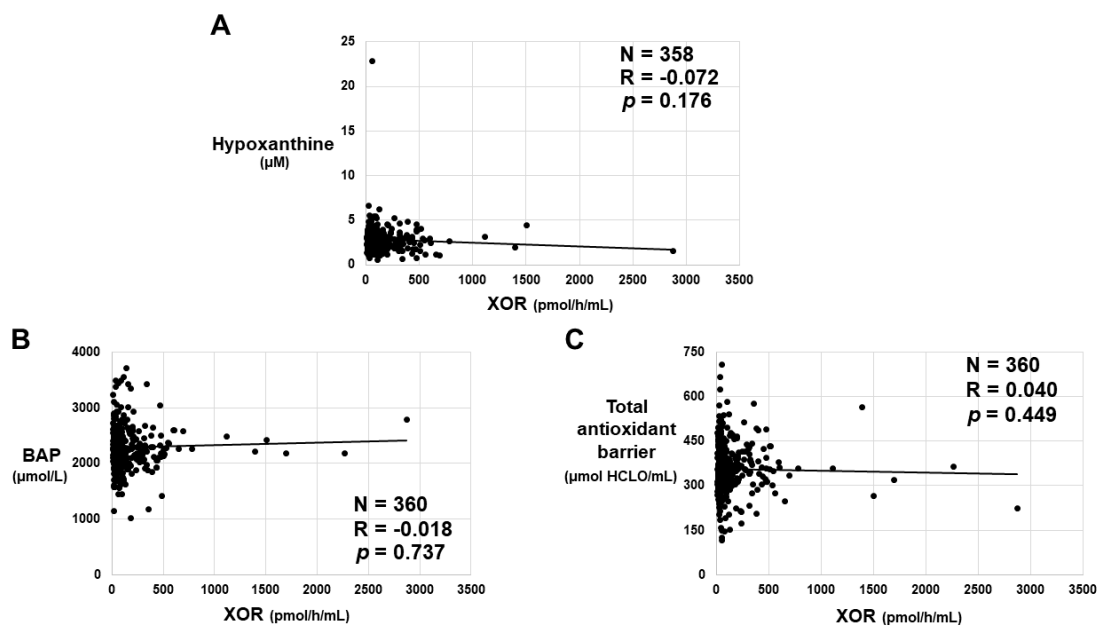

**Supplemental Figure S2.** The relationship between plasma XOR activities and the values of the purine metabolism-related marker (A) hypoxanthine, the oxidative stress markers (B) biological antioxidant potential (BAP) and (C) total antioxidant barrier. The correlation between two values was analyzed using Spearman's rank-correlation coefficient. N; the number of subjects, R; correlation coefficient.
